# Supplementary material for: SIRT1 enhances glucose tolerance by potentiating brown adipose tissue function
Source: PubMed Central journal article supplement — Mol Metab. 2014 Dec 18;4(2):118–31. doi: 10.1016/j.molmet.2014.12.008 (PMC4314542; doi:10.1016/j.molmet.2014.12.008), 2014-12-18

**Supplementary Data Inventory:**

**Supplemental Figure S1**

**Supplemental Figure S2**

**Supplemental Figure S3**

**Supplemental Figure S4**

**Supplemental Figure S5**

**Supplemental Figure S6**

**Supplemental Table 1. List of antibodies**

**Supplemental Table 2. List of oligonucleotides for mtDNA measure and qRT-PCR**

**Western Blot quantification**

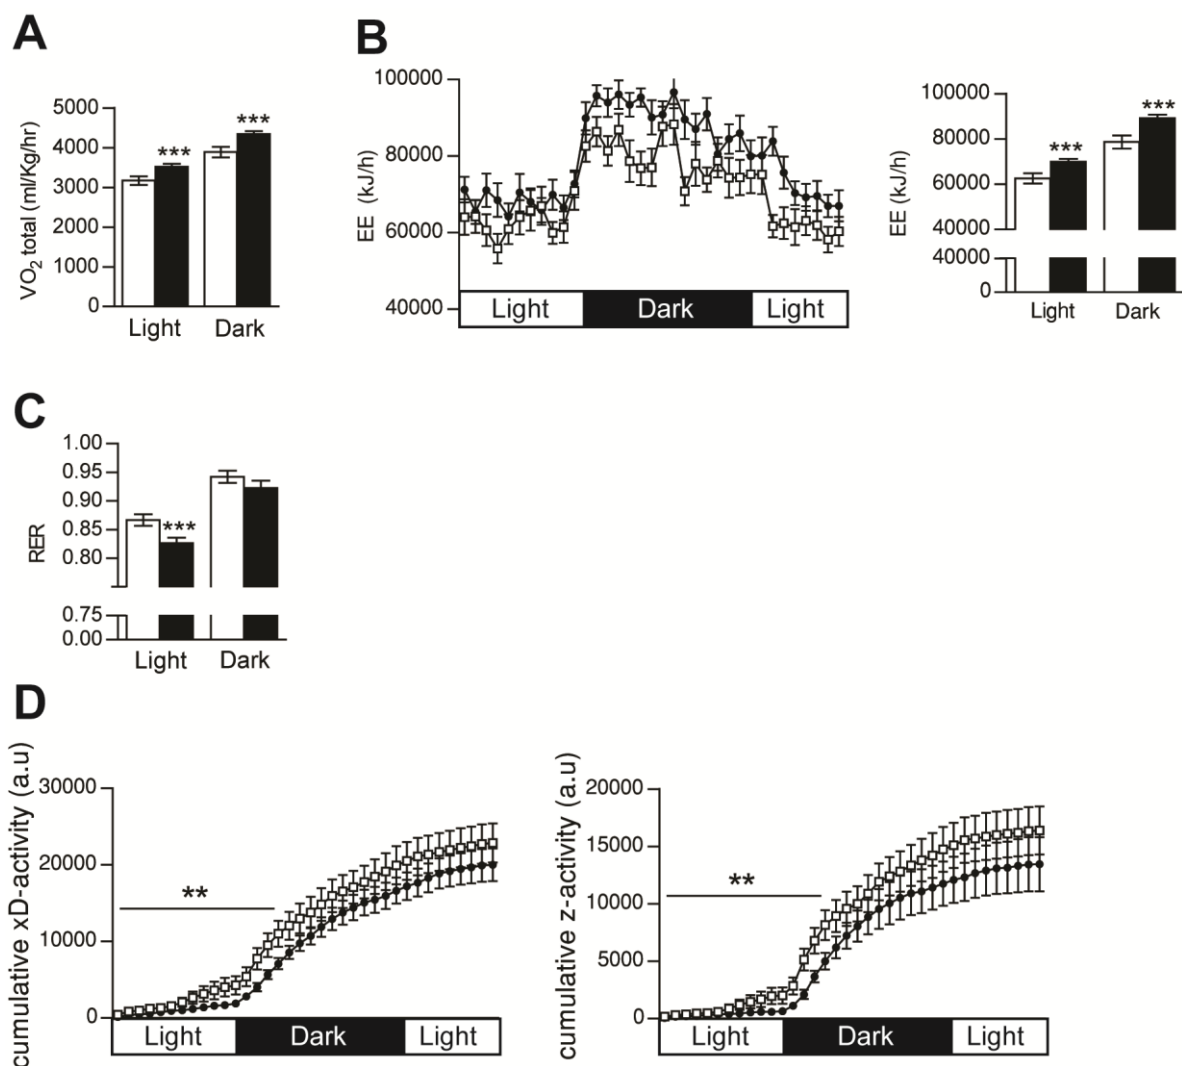

**Figure S1. Impact of SIRT1 transgenesis on energy homeostasis.**

(This supplemental figure is related to Figure 1 in the main text)

- (A) Quantification of O<sub>2</sub> consumption during dark and light phase for wild-type (WT) and SIRT1<sup>Tg/Tg</sup> (Tg) mice. The results illustrate a higher O<sub>2</sub> consumption in Tg mice.
- (B) Energy expenditure (EE) during dark and light phase for WT and Tg mice. The results illustrate a higher energy expenditure in Tg mice.
- (C) Quantification of the respiratory exchange ratio (RER) during the dark and light phase for WT and Tg mice. The results illustrate a lower RER in Tg mice during the light phase.
- (D) Cumulative xD and z-activity during light and dark phase. The results illustrate a lower activity of the Tg mice.

Through the figure, white bars and squares represent WT mice, while black bars and squares represent Tg mice. All values are shown as mean +/- SEM. \* Indicates statistical significant difference vs. WT.

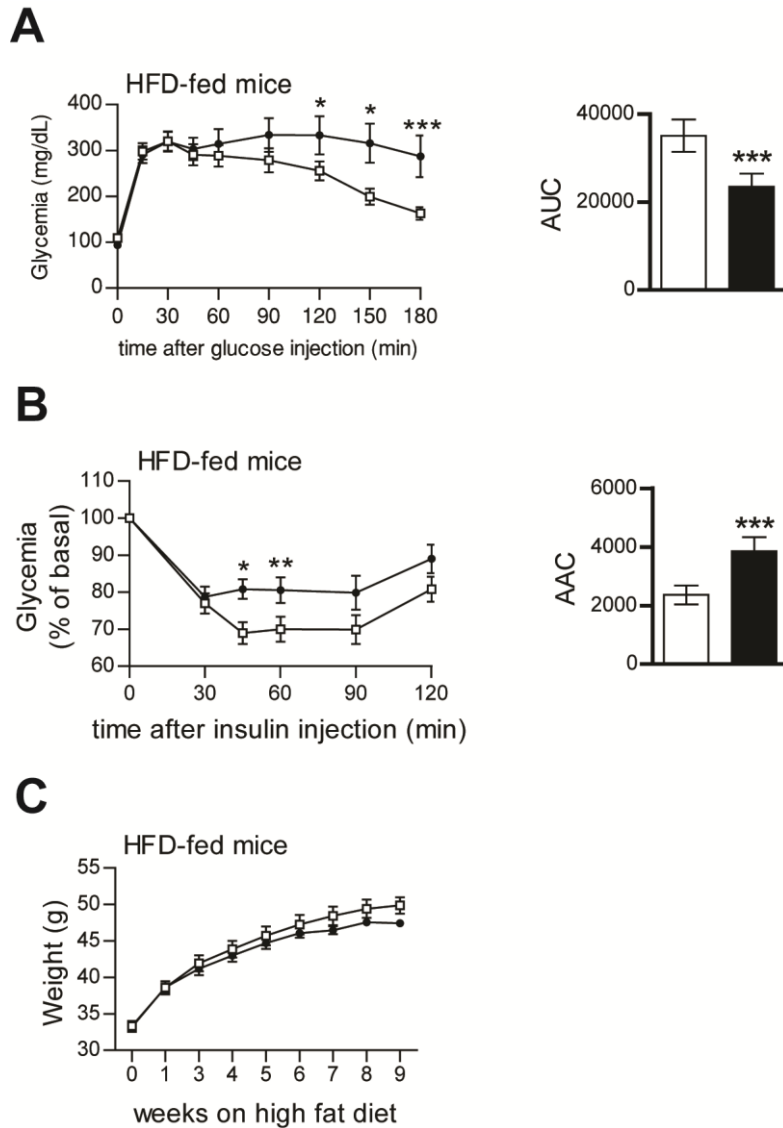

**Figure S2. Impact of SIRT1 transgenesis on the effects of high-fat diet on body weight and glucose metabolism.**

(This supplemental figure is related to Figure 2 in the main text)

**(A)** A glucose tolerance test (2 mg/kg) after an overnight fast reveals that Tg mice are protected against high-fat diet-induced glucose intolerance.

**(B)** An insulin tolerance test (0.75 U/Kg) after a 6 hr fast reveals that Tg mice are protected against high-fat diet-induced insulin resistance

**(C)** Body weight curves of WT and Tg mice upon high-fat feeding.

Through the figure, white squares represent WT mice, while black squares represent Tg mice. All values are shown as mean  $\pm$  SEM. \* Indicates statistical significant difference vs. WT.

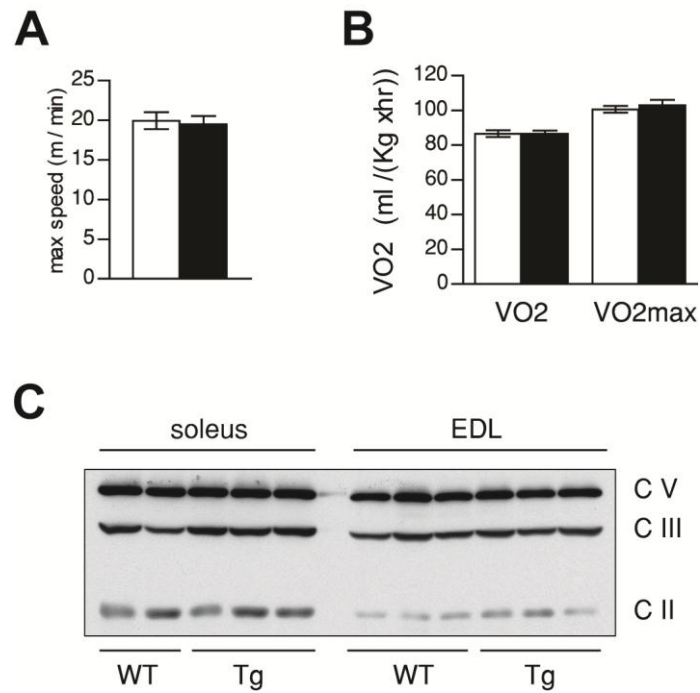

**Figure S3. Impact of SIRT1 transgenesis on running speed, VO<sub>2</sub> capacity and mitochondrial complexes in skeletal muscles.**

(This supplemental figure is related to Figure 3 in the main text)

**(A)** Mice were placed on a calorimetric treadmill in order to evaluate maximal running speed using a 10° degree inclination. No differences were observed between genotypes.

**(B)** As in (A), but VO<sub>2</sub> was recorded at the beginning of the experiment, when mice are not running, and at the end, upon obvious signs of exhaustion. No differences were observed between genotypes.

**(C)** Protein levels of different mitochondrial complexes in an oxidative (soleus) and a glycolytic (EDL) skeletal muscle from WT and Tg mice.

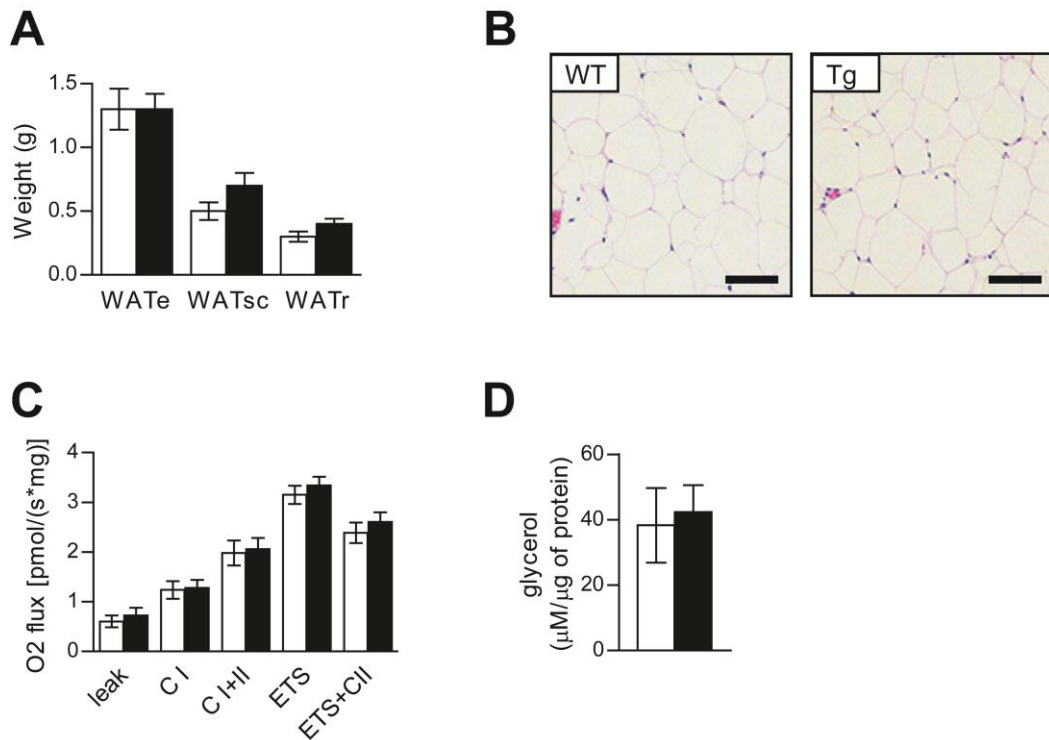

**Figure S4. White adipose tissue biology is not affected by SIRT1 transgenesis under low fat diet.**

(This supplemental figure is related to Figure 5 in the main text)

**(A)** Weight of epididymal (WATe), inguinal subcutaneous (WATsc) and retroperitoneal (WATr) white adipose depots in wild-type (WT) and SIRT1<sup>Tg/Tg</sup> (Tg) mice.

**(B)** Histological images of WATe from WT and Tg mice (bar = 600 μm).

**(C)** Respirometry analyses of WATe from WT and Tg mice reveal no difference between genotypes

**(D)** The lipolytic capacity of WAT, as monitored by glycerol release, is not affected by SIRT1 transgenesis

Through the figure, white bars represent WT mice, while black bars represent Tg mice. All values are shown as mean +/- SEM. \* Indicates statistical significant difference vs. WT.

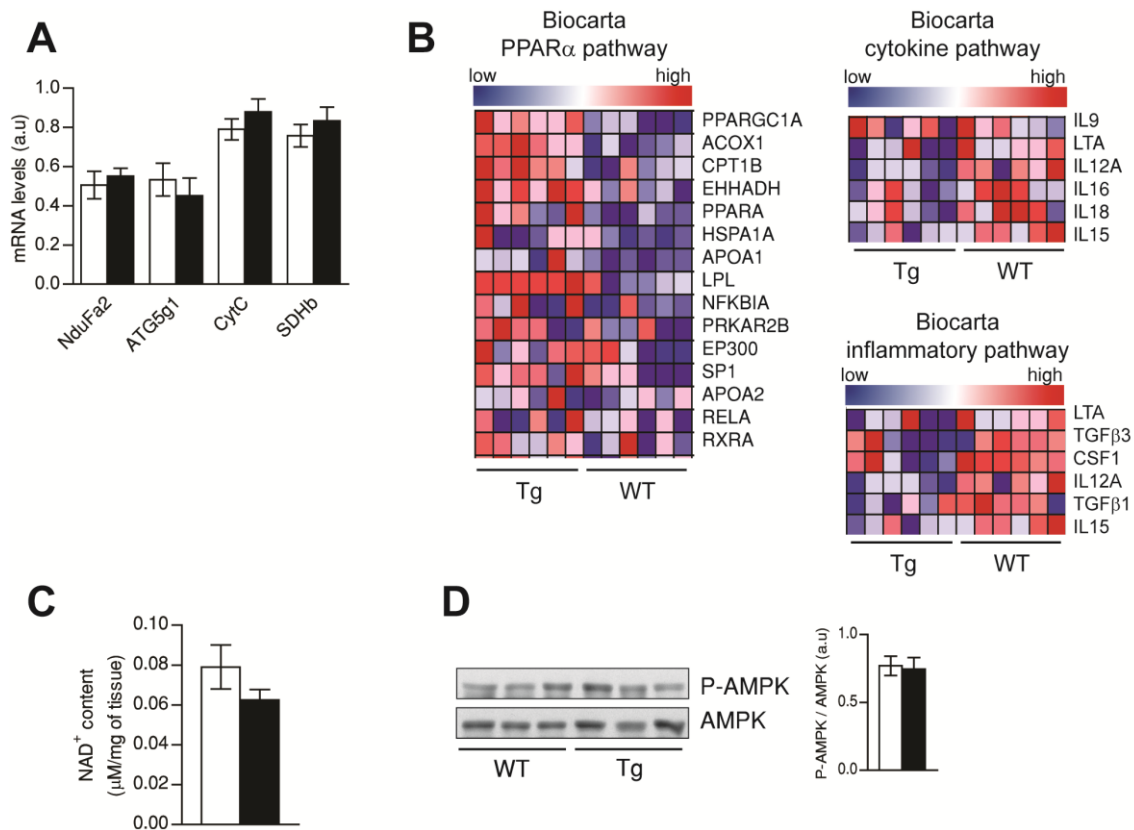

**Figure S5. The influence of SIRT1 transgenesis on BAT metabolism.**

(This supplemental figure is related to Figure 5 in the main text)

- (A) mRNA levels of mitochondrial respiratory components in BAT from WT and Tg mice.
- (B) Gene set enrichment analysis of the Biocarta PPAR $\alpha$ , cytokine and inflammatory pathways in BAT from WT and Tg mice (respective nominal  $p$  value : 0.033 ; 0.018; 0.008).
- (C) NAD<sup>+</sup> content is not modulated in BAT from WT and Tg mice.
- (D) Protein analysis and quantification of the protein levels of P-AMPK $\alpha$  (Thr172) and total AMPK $\alpha$  in BAT from WT and Tg mice. The ratio P-AMPK/AMPK reveals no difference between genotypes.

Through the figure, white bars represent WT mice, while black bars represent Tg mice. All values are shown as mean  $\pm$  SEM. \* Indicates statistical significant difference vs. WT.

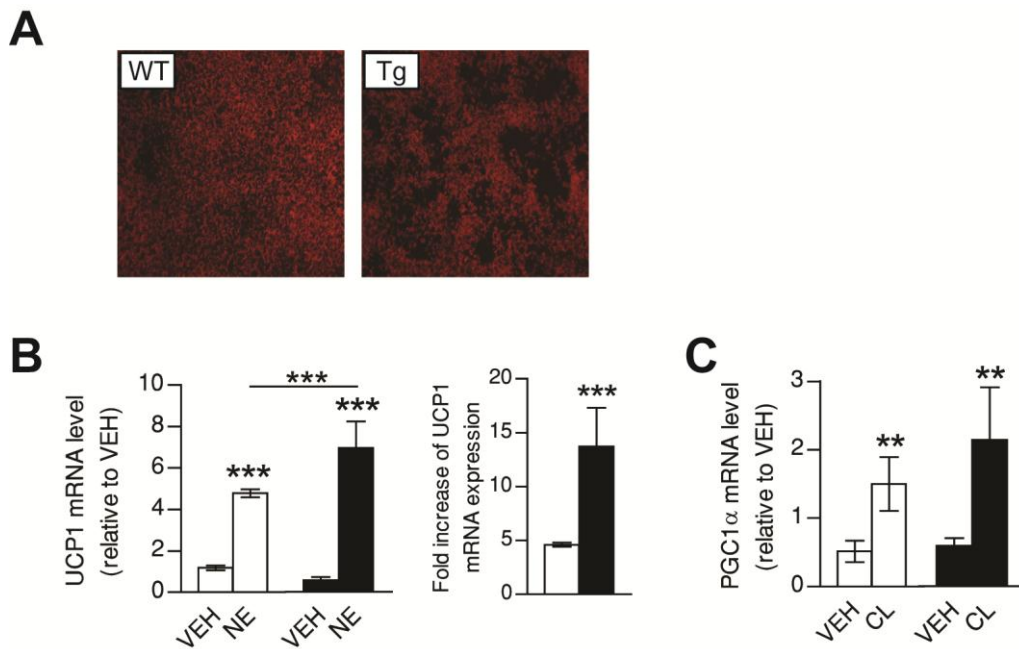

**Figure S6. The influence of SIRT1 transgenesis on BAT differentiation and function.**

(This supplemental figure is related to Figure 6 in the main text)

(A) Oil Red-O staining for differentiated wild-type (WT) and SIRT1 transgenic (Tg) primary brown adipocytes.

(B) Ucp1 mRNA levels in differentiated WT and Tg primary brown adipocytes treated with NE. Fold-increase over the vehicle-treated group is shown on the right.

(C) PGC1 $\alpha$  mRNA levels in differentiated WT and Tg primary brown adipocytes treated with CL. Fold-increase over the vehicle-treated group is shown on the right.

White bars represent WT mice, while black bars represent Tg mice. All values are mean  $\pm$  SEM of three samples per tissue and genotype. \* Indicates statistical significant difference vs. respective WT group.

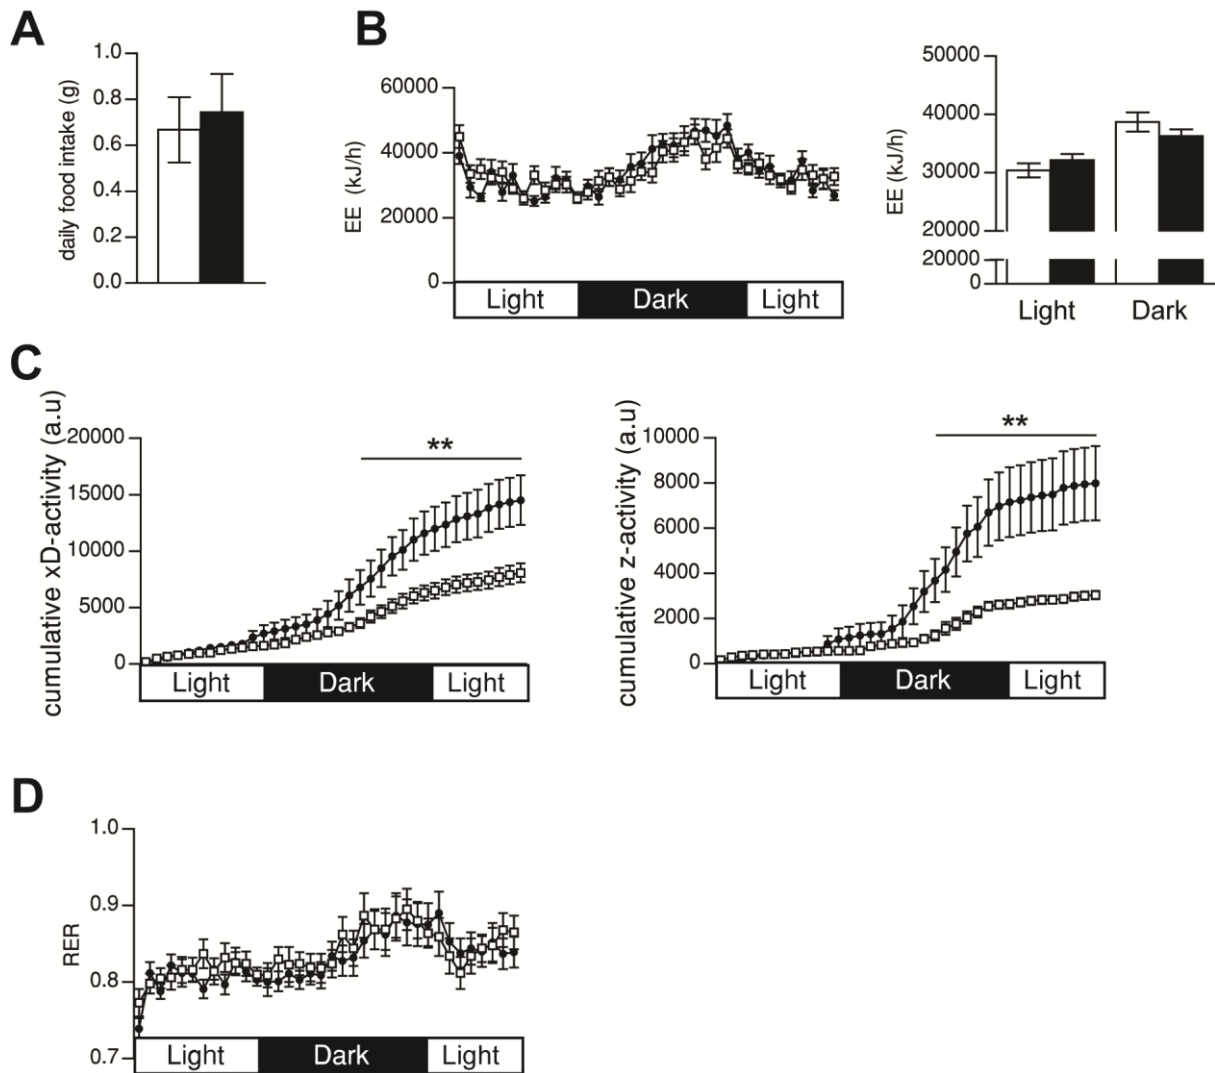

**Figure S7. The influence of SIRT1 transgenesis on energy expenditure in thermoneutrality.**

(This supplemental figure is related to Figure 7 in the main text)

- (A) Daily food intake of WT and Tg mice housed at thermoneutrality.
- (B) Energy expenditure (EE) during dark and light phase for WT and Tg mice.
- (C) Total activity of WT and Tg mice housed at thermoneutrality.
- (D) Respiratory Exchange Ratio of WT and Tg mice housed at thermoneutrality.

White square represent WT mice, while black squares represent Tg mice. All values are mean +/- SEM of three samples per tissue and genotype. \* Indicates statistical significant difference vs. respective WT group.



**Supplemental table 1. List of Antibodies**

| <b>Antibodies</b>               | <b>Manufacturer</b> | <b>reference</b> |
|---------------------------------|---------------------|------------------|
| $\alpha$ -Tubulin               | Sigma               | T9026            |
| SIRT1                           | Abcam               | ab12193          |
| complex I : NDUFA9              | Mitosciences        | ab14713          |
| Complex II : SDHA               | Abcam               | ab14715          |
| Complex III: UQCRC1             | Abcam               | ab14705          |
| Complex V : ATP5A               | Abcam               | ab109865         |
| GAPDH                           | cell signaling      | 2118             |
| UCP1                            | Abcam               | ab10983          |
| phospho HSL                     | Cell signaling      | 4139S            |
| HSL-Total                       | Cell signaling      | 4107S            |
| NFkB p65 (acetilated)           | Abcam               | ab52175          |
| NFkB p65                        | Santa Cruz          | sc-8008          |
| Prdm16                          | R&D system          | AF6295           |
| PPAR $\gamma$                   | cell signaling      | 2443             |
| Porin 31HL (VDCA1)              | Mitosciences        | ab14734          |
| Phospho-(Ser/Thr) PKA Substrate | Cell Signaling      | 9621             |
| Phospho-AMPK                    | Cell Signaling      | 2535             |
| Total AMPK                      | Cell Signaling      | 2532             |
| FoxO1                           | Cell Signaling      | 9454             |

**Supplemental table 2. List of oligonucleotides for mtDNA measurement and qRT-PCR**

| Gene                      | sequence |                            |
|---------------------------|----------|----------------------------|
| <i>b-2-microglobuline</i> | F        | ATGGGAAGCCGAACATACTG       |
|                           | R        | CAGTCTCAGTGGGGGTGAAT       |
| <i>cyclophilin</i>        | F        | CAGGGGAGATGGCACAGGAG       |
|                           | R        | CGGCTGTCTGTCTTGGTGTCTCC    |
| <i>sirt1</i>              | F        | TGTGAAGTTACTGCAGGAGTGATAA  |
|                           | R        | GCATAGATACCGTCTCTTGATCTGAA |
| <i>NduFa2</i>             | F        | GCACACATTTCCCCACACTG       |
|                           | R        | CCCAACCTGCCATTCTGAT        |
| <i>ATG5g1</i>             | F        | GCTGCTTGAGAGATGGGTTT       |
|                           | R        | AGTTGGTGTGGCTGGATCA        |
| <i>cytochrome c</i>       | F        | TCCATCAGGGTATCCTCTCC       |
|                           | R        | GGAGGCAAGCATAAGACTGG       |
| <i>SDHb</i>               | F        | GGACCTATGGTGTGGATGC        |
|                           | R        | GTGTGCACGCCAGAGTATTG       |
| <i>ppara</i>              | F        | AGGAAGCCGTTCTGTGACAT       |
|                           | R        | TTGAAGGAGCTTTGGGAAGA       |
| <i>lcad</i>               | F        | GTAGCTTATGAATGTGTGCAACTC   |
|                           | R        | GTCTTGCGATCAGCTCTTTCATTA   |
| <i>mcad</i>               | F        | GGCCATTAAGACCAAAGCAGA      |
|                           | R        | GTGTCCGGCTTCCACAATGAAT     |
| <i>cpt2</i>               | F        | AGCCAGTTCAGGAAGACAGA       |
|                           | R        | GACAGAGTCTCGAGCAGTTA       |
| <i>cpt1</i>               | F        | CCCATGTGCTCCTACCAGAT       |
|                           | R        | CCTTGAAGAAGCGACCTTTG       |
| <i>FoxO1</i>              | F        | AAGGATAAGGGCGACAGCAA       |
|                           | R        | TCCACCAAGAACTCTTTCCA       |
| <i>FoxO3a</i>             | F        | CTTCAAGGATAAGGGCGACAG      |
|                           | R        | CCTCGGCTCTTGGTGTACTTG      |
| <i>pgc1a</i>              | F        | AAGTGTGGAACCTCTGGAACTG     |
|                           | R        | GGGTTATCTTGGTTGGCTTTATG    |
| <i>pgc1b</i>              | F        | TGGAGACTGCTCTGGAAGGT       |
|                           | R        | TGCTGCTGTCCTCAAATACG       |
| <i>ppard</i>              | F        | AATGCGCTGGAGCTCGATGAC      |
|                           | R        | ACTGGCTGTCAGGGTGGTTG       |
| <i>g6pase</i>             | F        | CCGGATCTACCTTGCTGCTCACTT   |
|                           | R        | TAGCAGGTAGAATCCAAGCGCGAAAC |
| <i>pepck</i>              | F        | CCACAGCTGCTGCAGAACA        |
|                           | R        | GAAGGGTCGCATGGCAA          |
| <i>ucp1</i>               | F        | CTTTGCCTCACTCAGGATTGG      |
|                           | R        | ACTGCCACACCTCCAGTCATT      |

|               |   |                           |
|---------------|---|---------------------------|
| <i>cidea</i>  | F | TGCTCTTCTGTATCGCCCAGT     |
|               | R | GCCGTGTTAAGGAATCTGCTG     |
| <i>prdm16</i> | F | TGGCCTTCATCACCTCTCTGAA    |
|               | R | TTTCTGATCCACGGCTCCTGTGA   |
| <i>dio2</i>   | F | AGAGTGGAGGCGCATGCT        |
|               | R | GGCATCTAGGAGGAAGCTGTTT    |
| <i>pparg</i>  | F | ATGGGTGAAACTCTGGGAGATTCT  |
|               | R | CTTGGAGCTTCAGGTCATATTTGTA |
| <i>cox2</i>   | F | GTTGATAACCGAGTCGTTCTGC    |
|               | R | CCTGGGATGGCATCAGTTTT      |
| <i>hk2</i>    | F | GCCAGCCTCTCCTGATTTTAGTGT  |
|               | R | GGGAACACAAAAGACCTCTTCTGG  |

**Western Blot quantification**

**Figure 1A**

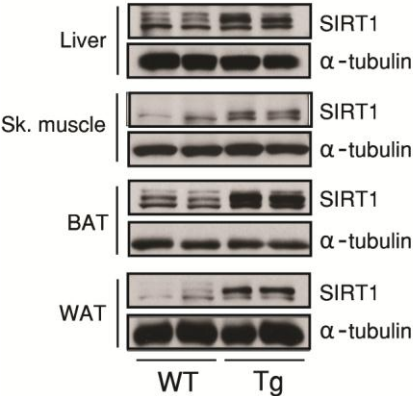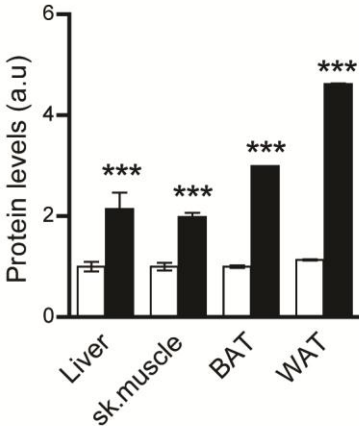

**Figure 3F**

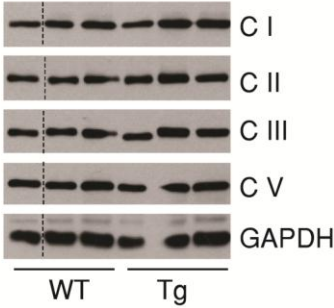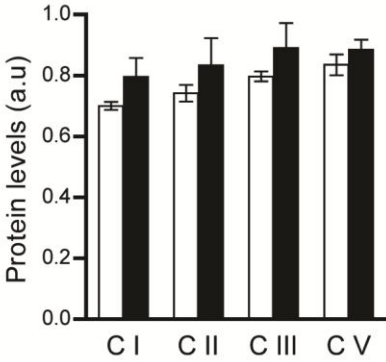

**Figure 4H**

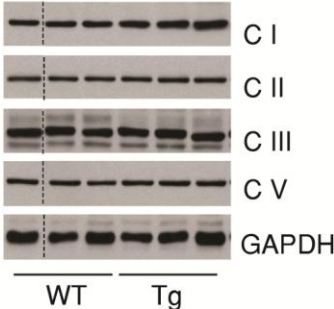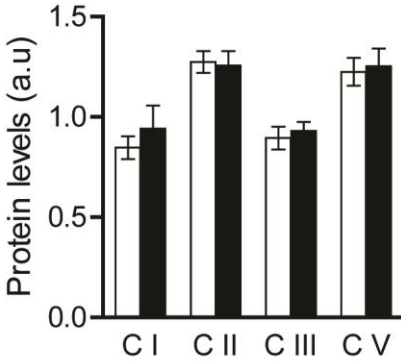

Figure 5E

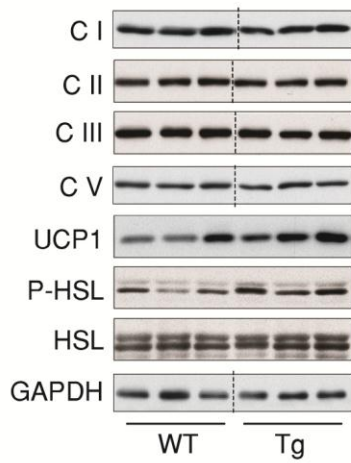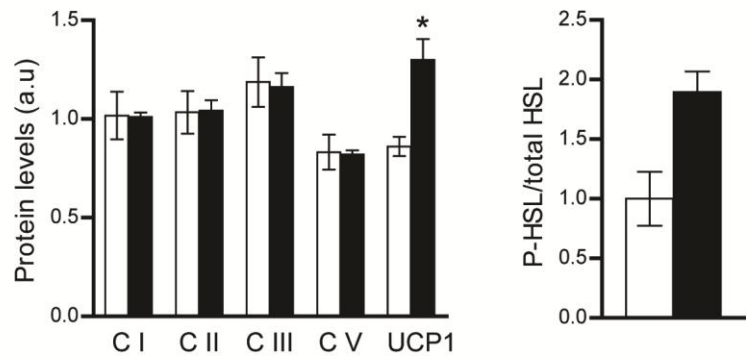

Figure 5K

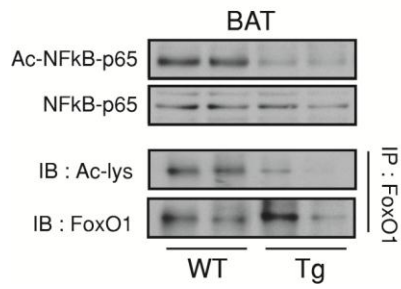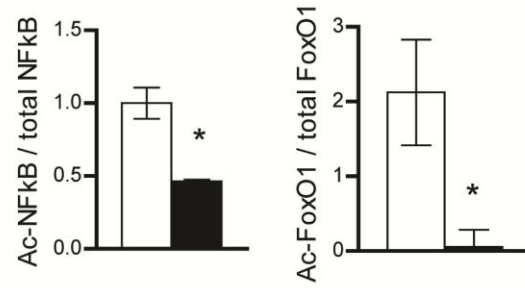

Figure 6D

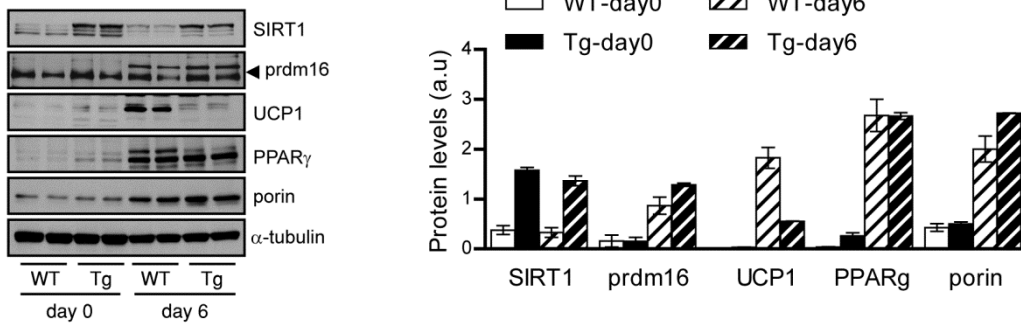

Figure 6F

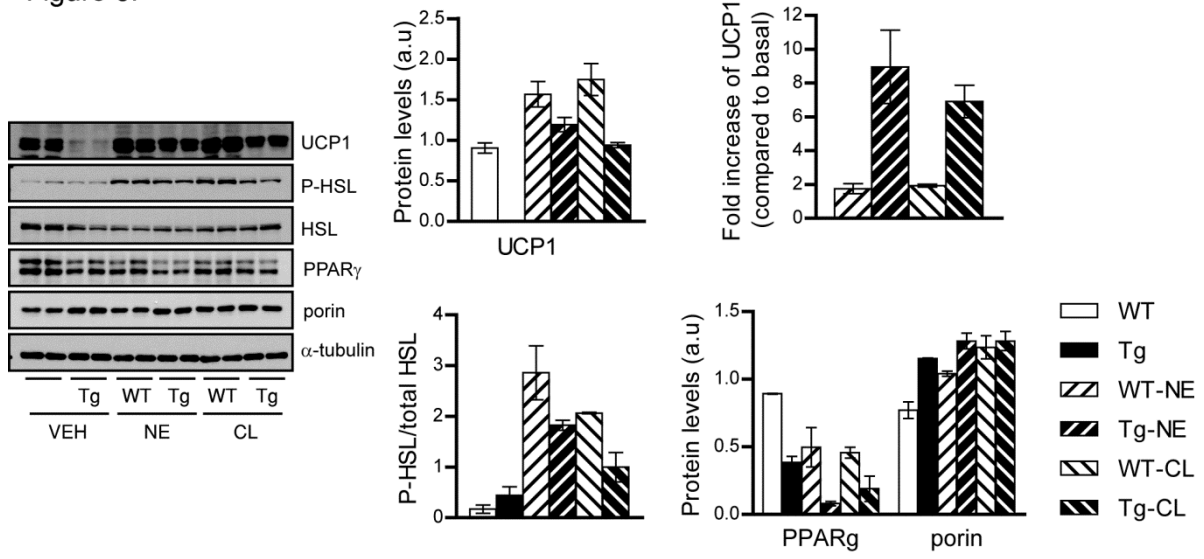

Figure 7I

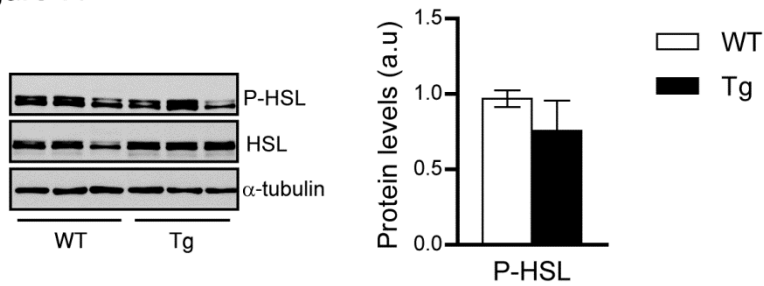

Supplement: mmc1.pdf [file mmc1.pdf]
